# Supplementary material
Source: MDPI journal article supplement (https://www.mdpi.com/2075-5309/13/7/1736)

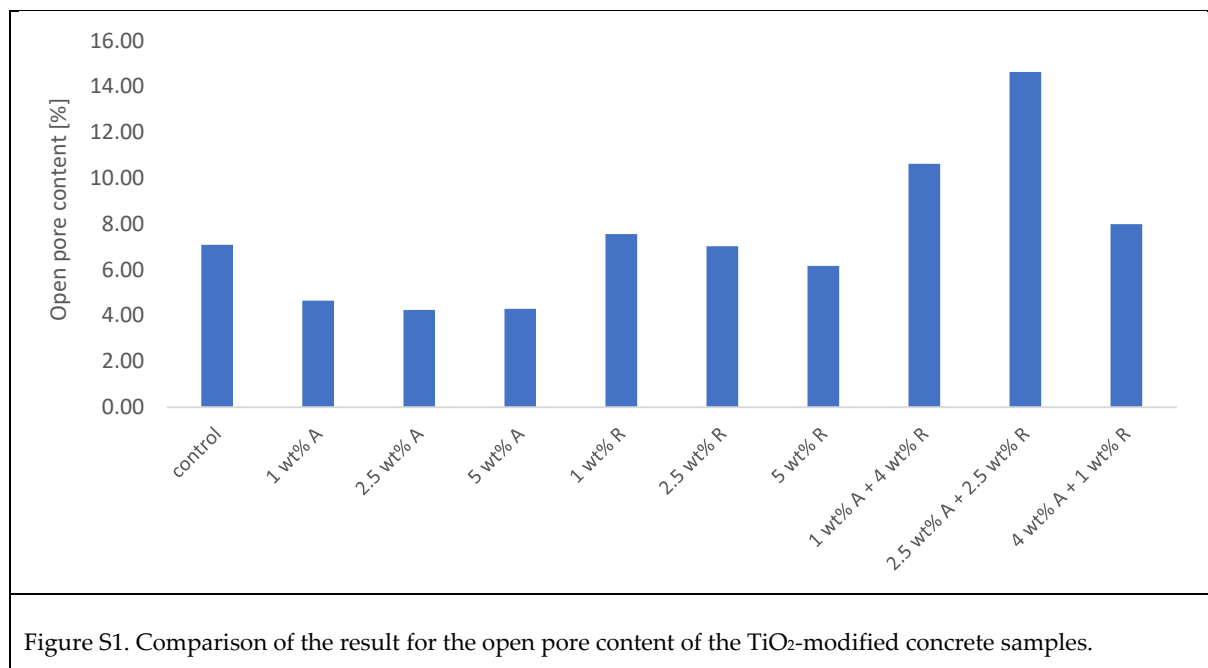

Supplement: s1 [file s1]
